# Supplementary figures and images for: Analysis of mRNA and lncRNA Expression Profiles of Breast Muscle during Pigeon (Columba livia) Development
Source: MDPI journal article supplement (doi:10.3390/genes13122314), 2022-12-08

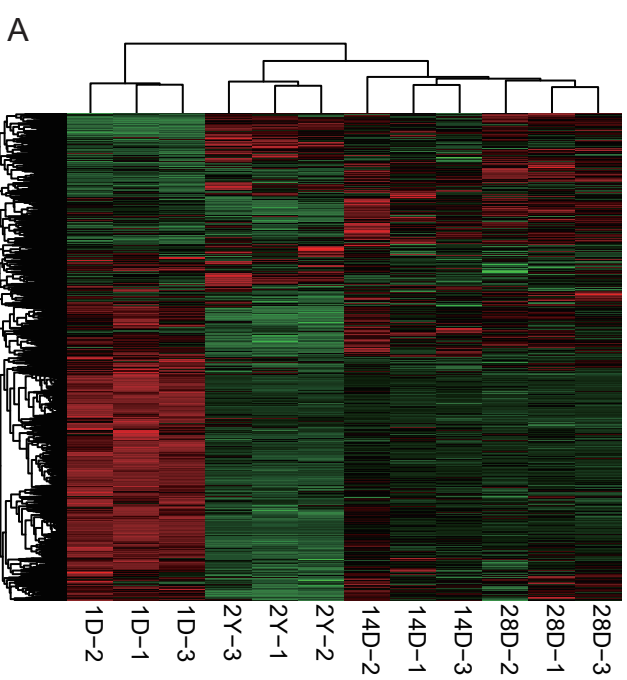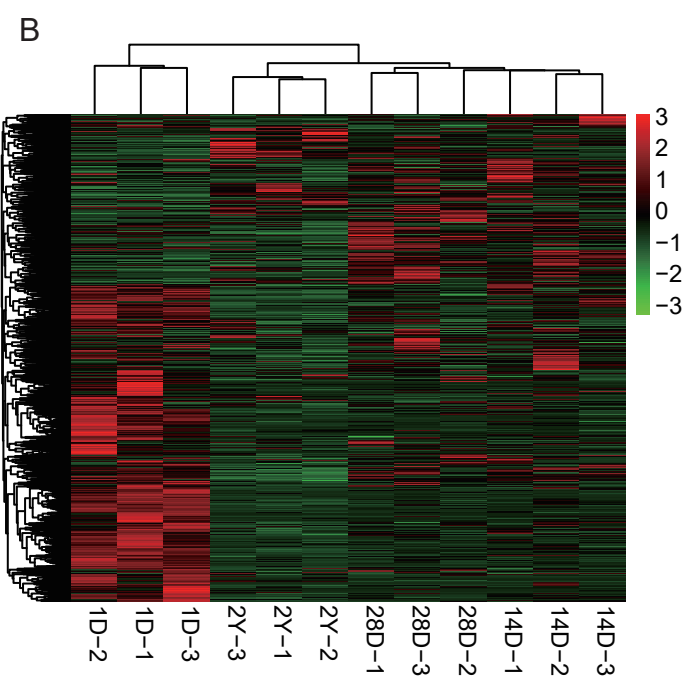

Supplement: s1 [file s1]

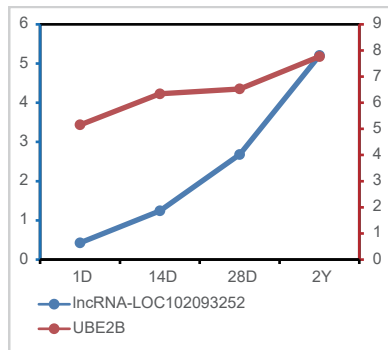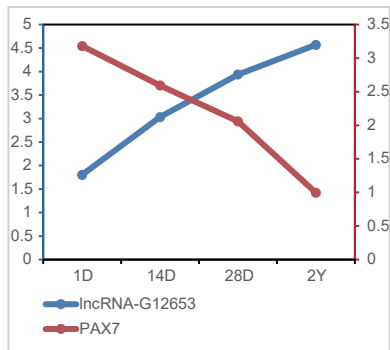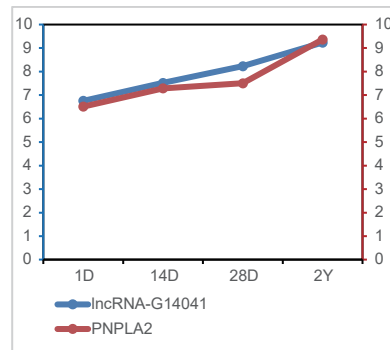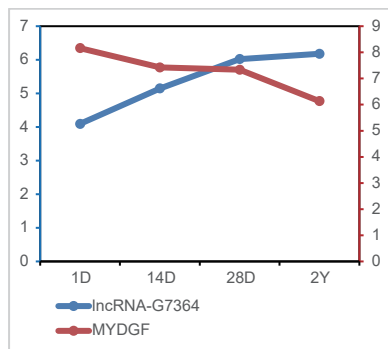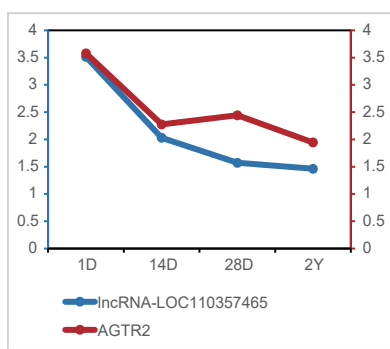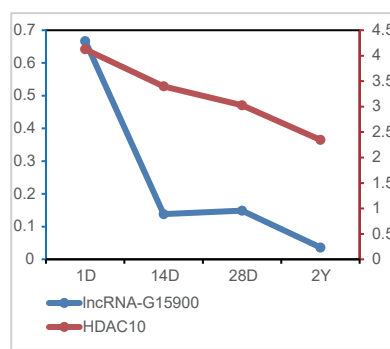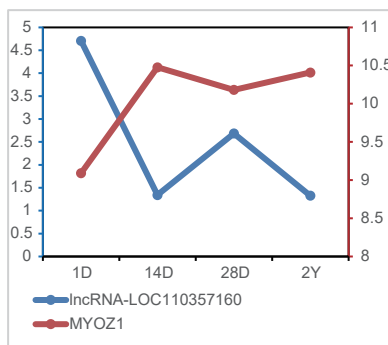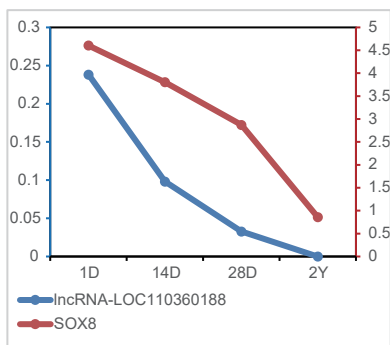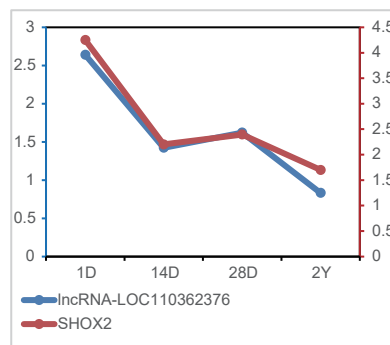

Supplement: s1 [file s1]

A

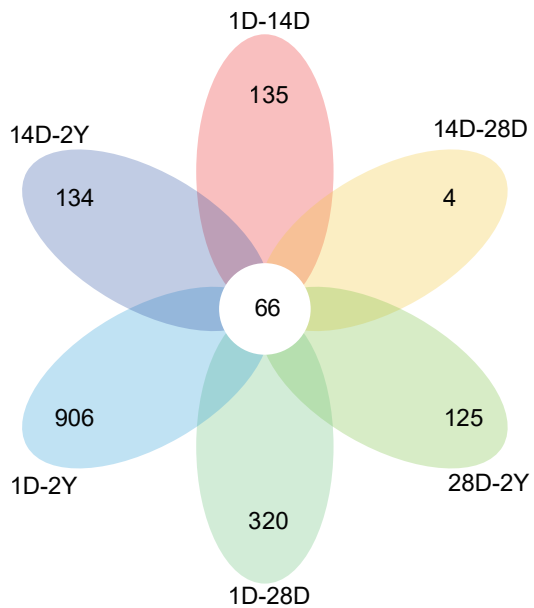

B

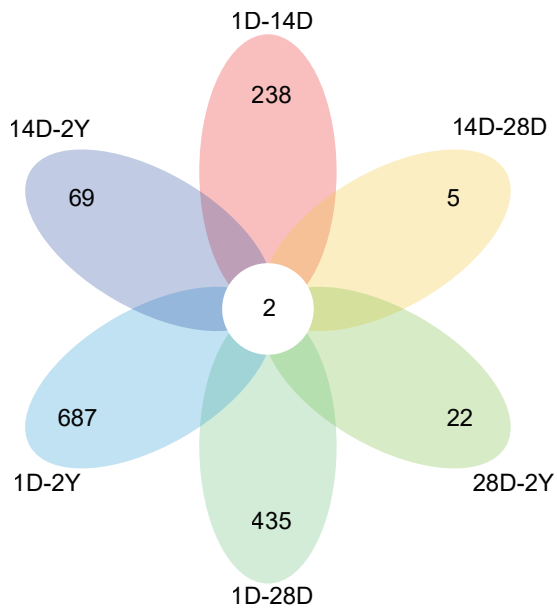

Supplement: s1 [file s1]
